# Supplementary material for: Synthesis and characterization of bevacizumab-functionalized nanoliposomes loaded with regorafenib and fluorescent carbon dots for triple-negative breast cancer theranostics
Source: Royal Society of Chemistry journal article supplement (doi:10.1039/d6ra03364d), 2026-05-26
Supplement: d6ra03364d1.pdf [file d6ra03364d1.pdf]

**Synthesis and characterization of bevacizumab-functionalized nanoliposomes loaded with regorafenib and fluorescent carbon dots for triple-negative breast cancer theranostics**

Armita Aryanmanesh, Abolghasem Abbasi Kajani\*

Department of Biotechnology, Faculty of Biological Science and Technology, University of Isfahan, Isfahan, 81746-73441, Iran

\* Corresponding author:

Abolghasem Abbasi Kajani

Department of Biotechnology, Faculty of Biological Science and Technology, University of Isfahan, Isfahan 81746-73441, Iran, Tel: +98-3137934401, Fax: +98-3137932342, Email: [agh.abbasi@bio.ui.ac.ir](mailto:agh.abbasi@bio.ui.ac.ir) , [agh.abasi@gmail.com](mailto:agh.abasi@gmail.com)

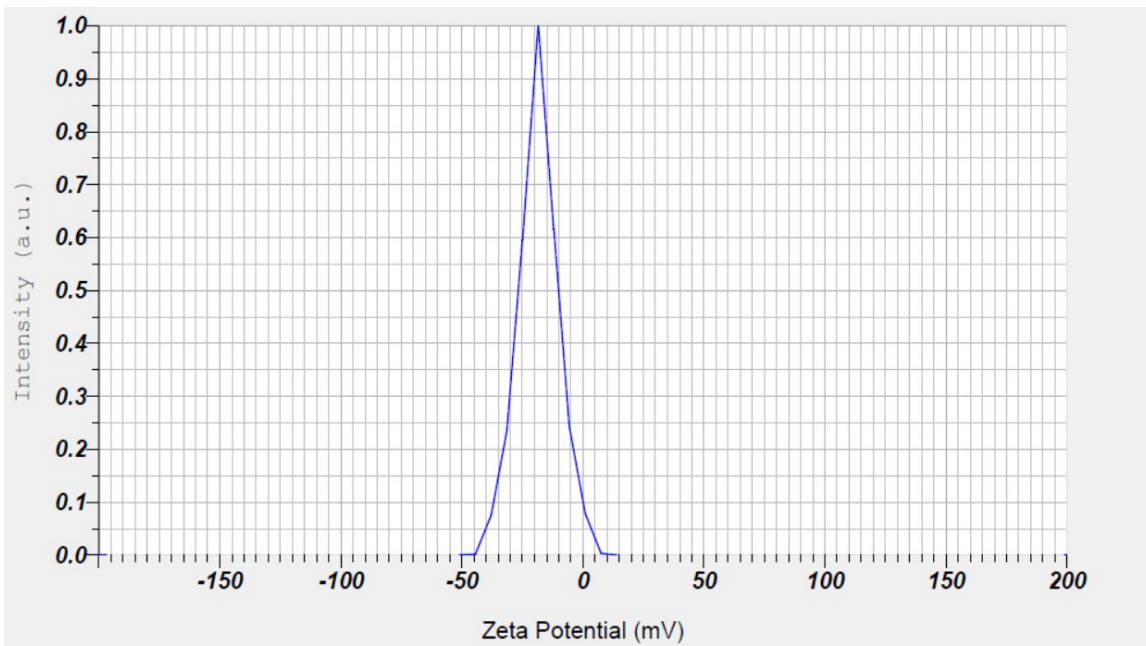

**Fig. S1.** Zeta potential of hydrothermally synthesized CDs using sucrose and mPDA.

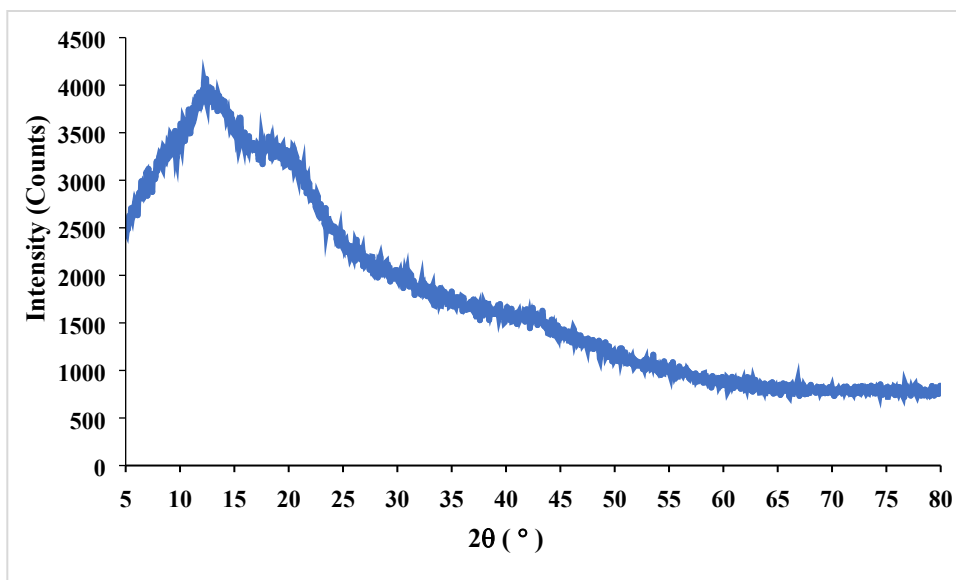

**Fig. S2.** The XRD pattern of CDs synthesized hydrothermally using sucrose and mPDA.

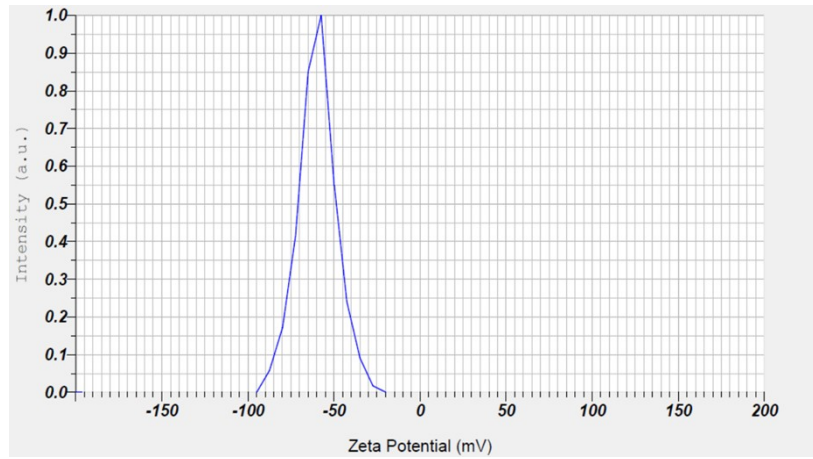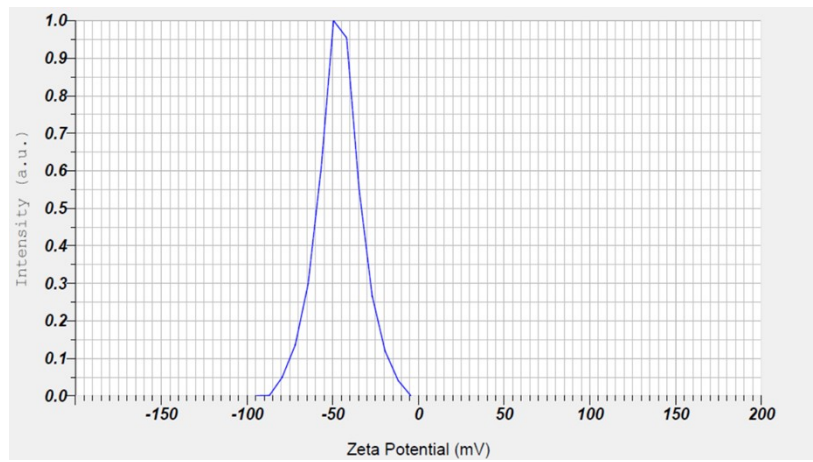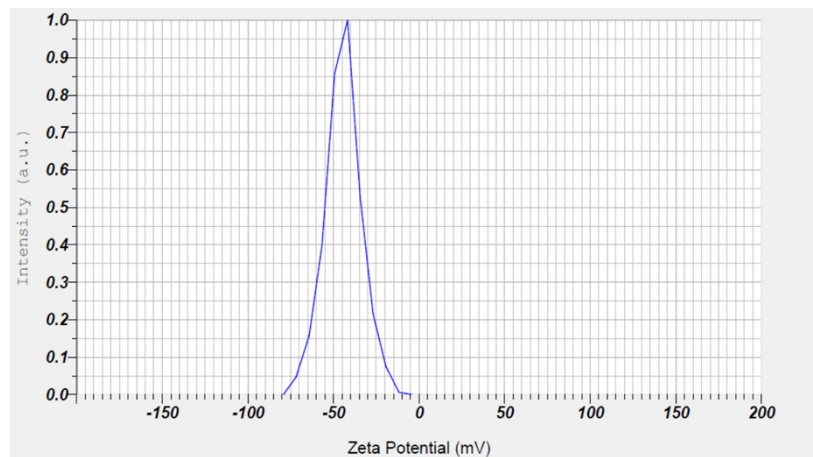

**Fig. S3.** Zeta potential of NLPs, B-NLPs, and BCR-NLPs.

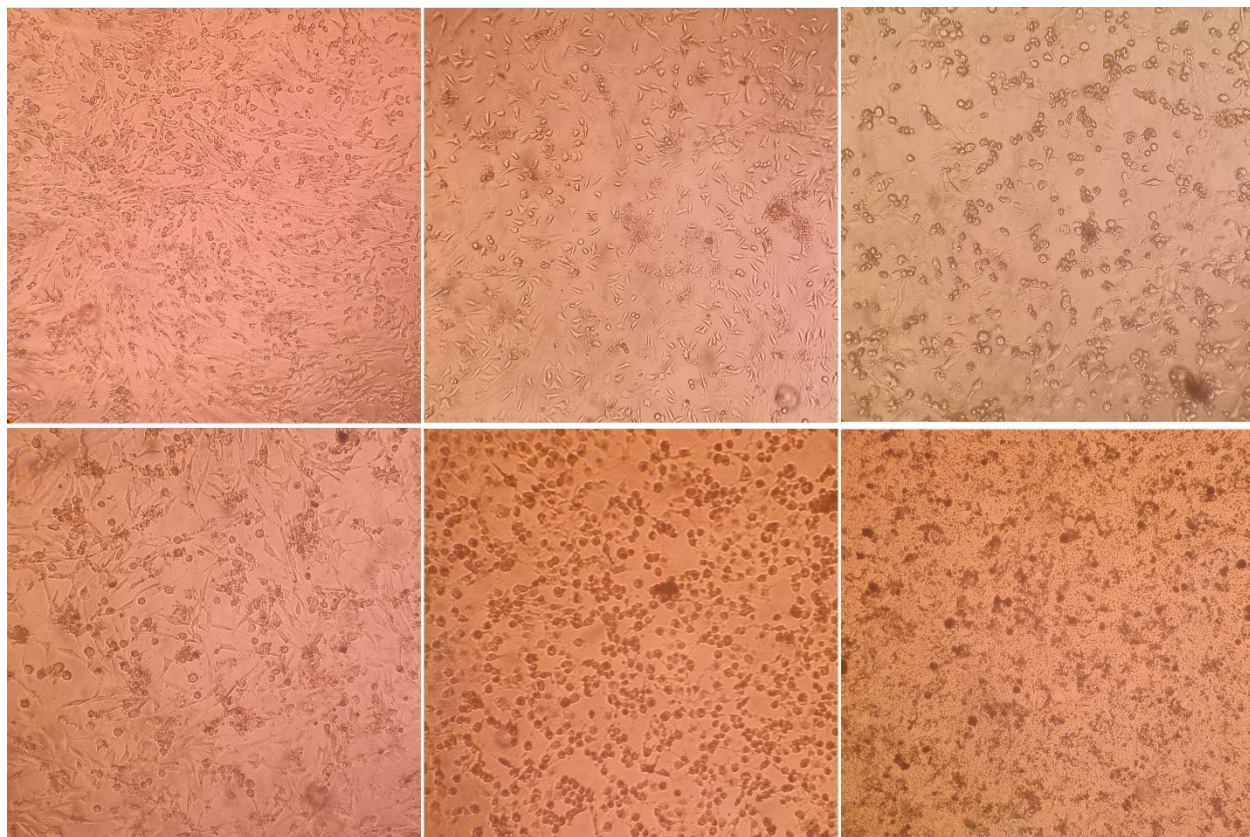

**Fig. S4.** The microscopic imaging of MDA-MB-231 cells after exposure with different NLPs. Left to right: Control, CDs, NLPs (up), and Regorafenib, CR-NLPs, and BCR-NLPs (down).

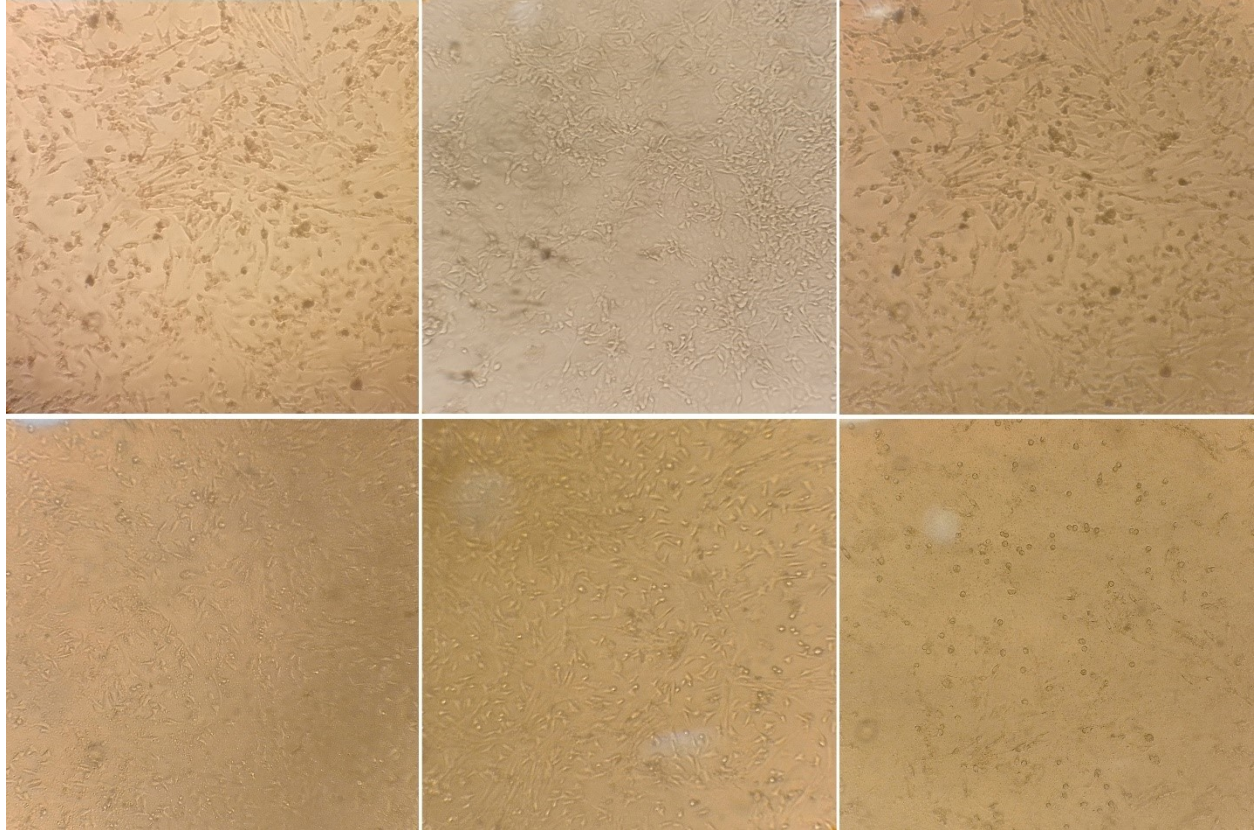

**Fig. S5.** The microscopic imaging of HFB cells after exposure with different NLPs. Left to right: Control, CDs, NLPs (up), and Regorafenib, CR-NLPs, and BCR-NLPs (down).
